# Supplementary material
Source: HighWire-hosted journal article supplement (https://www.ajnr.org/highwire/filestream/97837/field_highwire_adjunct_files/0/1263.pdf)
Supplement: 1263.pdf [file 1263.pdf]

**Supplementary Table 1.** Anatomic location of statistically significant regions revealed by voxel-wise analysis for total sodium concentration (TSC), fractional anisotropy (FA), mean diffusivity (MD), radial diffusivity (RD) and axial diffusivity (AD) in ALS patients, Fast progressors, slow progressors, compared to healthy controls.

|                                                                                                                                                                                                                                                                         | Cluster size | Minimal p-value |       | MNI coordinates |     |    |
|-------------------------------------------------------------------------------------------------------------------------------------------------------------------------------------------------------------------------------------------------------------------------|--------------|-----------------|-------|-----------------|-----|----|
|                                                                                                                                                                                                                                                                         |              | DTI             | TSC   | X               | Y   | Z  |
| <b>ALS versus HC</b>                                                                                                                                                                                                                                                    |              |                 |       |                 |     |    |
| <b>TSC <math>\cap</math> FA</b>                                                                                                                                                                                                                                         |              |                 |       |                 |     |    |
| Body of corpus callosum, superior corona radiata left, corticospinal tract left, posterior corona radiata left.                                                                                                                                                         | 1584         | 0.036           | 0.048 | -20             | -20 | 37 |
| Body of corpus callosum, superior corona radiata right, corticospinal tract right, genu of corpus callosum, posterior corona radiata right, Superior longitudinal fasciculus right, forceps minor, superior longitudinal fasciculus right, splenium of corpus callosum. | 1565         | 0.024           | 0.048 | 16              | -16 | 34 |
| Body of corpus callosum, genu of corpus callosum, forceps minor.                                                                                                                                                                                                        | 60           | 0.047           | 0.042 | -17             | 25  | 18 |
| Anterior corona radiata right, anterior thalamic radiation right, Inferior fronto-occipital fasciculus right.                                                                                                                                                           | 33           | 0.015           | 0.046 | 22              | 31  | 7  |
| Inferior fronto-occipital fasciculus right, anterior corona radiata right.                                                                                                                                                                                              | 19           | 0.044           | 0.048 | 24              | 28  | 1  |
| Genu of corpus callosum, forceps minor.                                                                                                                                                                                                                                 | 13           | 0.044           | 0.048 | 14              | 31  | 8  |
| Unclassified.                                                                                                                                                                                                                                                           | 7            | 0.047           | 0.040 | -24             | -20 | 44 |

|                                                                                                                                           |     |       |       |     |     |    |
|-------------------------------------------------------------------------------------------------------------------------------------------|-----|-------|-------|-----|-----|----|
| Inferior fronto-occipital fasciculus right, anterior corona radiata right.                                                                | 2   | 0.036 | 0.040 | 25  | 27  | 9  |
| Unclassified                                                                                                                              | 1   | 0.039 | 0.036 | 16  | 3   | 51 |
| Body of corpus callosum.                                                                                                                  | 1   | 0.039 | 0.034 | 14  | -8  | 35 |
| Body of corpus callosum.                                                                                                                  | 1   | 0.019 | 0.034 | 11  | -3  | 29 |
| Body of corpus callosum.                                                                                                                  | 1   | 0.005 | 0.028 | 19  | 17  | 25 |
| Genu of corpus callosum, forceps minor.                                                                                                   | 1   | 0.003 | 0.029 | 10  | 29  | 8  |
| <b>TSC <math>\cap</math> MD</b>                                                                                                           |     |       |       |     |     |    |
| Superior corona radiata left, corticospinal tract left, body of corpus callosum, posterior corona radiata left.                           | 737 | 0.027 | 0.048 | -24 | -20 | 33 |
| Superior corona radiata right, corticospinal tract right, Superior longitudinal fasciculus right, superior longitudinal fasciculus right. | 311 | 0.050 | 0.044 | 24  | -13 | 32 |
| Posterior limb of internal capsule left, corticospinal tract left.                                                                        | 28  | 0.049 | 0.046 | -26 | -19 | 15 |
| Body of corpus callosum.                                                                                                                  | 20  | 0.030 | 0.033 | -16 | 8   | 28 |
| Superior corona radiata left, posterior limb of internal capsule left, corticospinal tract left.                                          | 16  | 0.049 | 0.033 | -22 | -11 | 18 |
| Superior corona radiata right.                                                                                                            | 1   | 0.028 | 0.033 | 25  | -13 | 35 |
| Superior corona radiata left.                                                                                                             | 1   | 0.032 | 0.029 | -30 | -19 | 26 |
| Superior corona radiata left.                                                                                                             | 1   | 0.023 | 0.029 | -26 | -9  | 24 |
| <b>TSC <math>\cap</math> RD</b>                                                                                                           |     |       |       |     |     |    |

|                                                                                                                                                                                                                                                                         |      |       |       |     |     |    |
|-------------------------------------------------------------------------------------------------------------------------------------------------------------------------------------------------------------------------------------------------------------------------|------|-------|-------|-----|-----|----|
| Superior corona radiata right, body of corpus callosum, corticospinal tract right, Superior longitudinal fasciculus right, superior longitudinal fasciculus right, posterior corona radiata right, genu of corpus callosum, forceps minor, splenium of corpus callosum. | 1771 | 0.048 | 0.048 | 19  | -18 | 36 |
| Superior corona radiata left, body of corpus callosum, corticospinal tract left, posterior corona radiata left.                                                                                                                                                         | 1599 | 0.047 | 0.048 | -24 | -22 | 34 |
| Body of corpus callosum.                                                                                                                                                                                                                                                | 31   | 0.037 | 0.046 | -16 | 10  | 27 |
| Unclassified.                                                                                                                                                                                                                                                           | 18   | 0.046 | 0.036 | 17  | -3  | 46 |
| Genu of corpus callosum, forceps minor.                                                                                                                                                                                                                                 | 17   | 0.046 | 0.048 | -17 | 25  | 18 |
| Unclassified.                                                                                                                                                                                                                                                           | 9    | 0.047 | 0.042 | -24 | -20 | 44 |
| Unclassified.                                                                                                                                                                                                                                                           | 7    | 0.049 | 0.044 | -35 | -24 | 39 |
| Body of corpus callosum.                                                                                                                                                                                                                                                | 3    | 0.049 | 0.044 | -16 | 17  | 24 |
| Body of corpus callosum.                                                                                                                                                                                                                                                | 1    | 0.041 | 0.046 | 14  | -8  | 35 |
| Body of corpus callosum.                                                                                                                                                                                                                                                | 1    | 0.040 | 0.044 | 13  | -6  | 34 |
| Body of corpus callosum.                                                                                                                                                                                                                                                | 1    | 0.040 | 0.038 | 11  | 3   | 28 |
| Body of corpus callosum.                                                                                                                                                                                                                                                | 1    | 0.048 | 0.038 | 19  | 15  | 26 |
| Body of corpus callosum.                                                                                                                                                                                                                                                | 1    | 0.033 | 0.035 | 19  | 17  | 25 |
| Body of corpus callosum.                                                                                                                                                                                                                                                | 1    | 0.035 | 0.042 | -16 | 14  | 25 |
| Genu of corpus callosum.                                                                                                                                                                                                                                                | 1    | 0.034 | 0.033 | -17 | 20  | 22 |
| Genu of corpus callosum, forceps minor.                                                                                                                                                                                                                                 | 1    | 0.007 | 0.029 | 16  | 31  | 14 |
| Genu of corpus callosum, forceps minor.                                                                                                                                                                                                                                 | 1    | 0.009 | 0.028 | 17  | 32  | 12 |
| <b>Fast versus HC</b>                                                                                                                                                                                                                                                   |      |       |       |     |     |    |
| <b>TSC <math>\cap</math> FA</b>                                                                                                                                                                                                                                         |      |       |       |     |     |    |

|                                                                                                                                                                                                                                                                                                                                             |      |       |       |     |     |    |
|---------------------------------------------------------------------------------------------------------------------------------------------------------------------------------------------------------------------------------------------------------------------------------------------------------------------------------------------|------|-------|-------|-----|-----|----|
| Body of corpus callosum, genu of corpus callosum, forceps minor, superior corona radiata right, superior corona radiata left, corticospinal tract left, anterior corona radiata right, corticospinal tract right, posterior corona radiata right, posterior corona radiata left, anterior corona radiata left, splenium of corpus callosum. | 4334 | 0.031 | 0.049 | -18 | -20 | 34 |
| Genu of corpus callosum, forceps minor.                                                                                                                                                                                                                                                                                                     | 20   | 0.040 | 0.049 | -12 | 25  | -6 |
| Superior corona radiata left, corticospinal tract left.                                                                                                                                                                                                                                                                                     | 13   | 0.032 | 0.049 | -26 | -20 | 32 |
| Body of corpus callosum.                                                                                                                                                                                                                                                                                                                    | 8    | 0.023 | 0.049 | 8   | -27 | 24 |
| Body of corpus callosum.                                                                                                                                                                                                                                                                                                                    | 5    | 0.019 | 0.044 | 11  | -25 | 26 |
| Unclassified.                                                                                                                                                                                                                                                                                                                               | 5    | 0.040 | 0.044 | -8  | 16  | -8 |
| Body of corpus callosum.                                                                                                                                                                                                                                                                                                                    | 4    | 0.032 | 0.035 | 9   | -7  | 28 |
| Body of corpus callosum.                                                                                                                                                                                                                                                                                                                    | 1    | 0.040 | 0.041 | 10  | -20 | 26 |
| Body of corpus callosum.                                                                                                                                                                                                                                                                                                                    | 1    | 0.040 | 0.041 | 7   | -19 | 25 |
| Body of corpus callosum.                                                                                                                                                                                                                                                                                                                    | 1    | 0.019 | 0.024 | 8   | -21 | 25 |
| Genu of corpus callosum, forceps minor.                                                                                                                                                                                                                                                                                                     | 1    | 0.021 | 0.022 | -13 | 29  | -3 |
| Genu of corpus callosum.                                                                                                                                                                                                                                                                                                                    | 1    | 0.005 | 0.013 | -12 | 22  | -7 |
| <b>TSC <math>\cap</math> MD</b>                                                                                                                                                                                                                                                                                                             |      |       |       |     |     |    |
| Superior corona radiata right, body of corpus callosum, corticospinal tract right, Superior longitudinal fasciculus right, superior longitudinal fasciculus right, anterior corona radiata right, genu of corpus callosum.                                                                                                                  | 1648 | 0.045 | 0.049 | 26  | -12 | 30 |

|                                                                                                                                                                                                                                                                            |      |       |       |     |     |    |
|----------------------------------------------------------------------------------------------------------------------------------------------------------------------------------------------------------------------------------------------------------------------------|------|-------|-------|-----|-----|----|
| Superior corona radiata left, body of corpus callosum, corticospinal tract left, posterior corona radiata left.                                                                                                                                                            | 1114 | 0.024 | 0.026 | -24 | -20 | 33 |
| Genu of corpus callosum, forceps minor, body of corpus callosum, anterior corona radiata right.                                                                                                                                                                            | 752  | 0.044 | 0.049 | -4  | 28  | 6  |
| Anterior limb of internal capsule right, superior fronto-occipital fasciculus (could be a part of anterior internal capsule) right, superior corona radiata right, posterior limb of internal capsule right, anterior thalamic radiation right, corticospinal tract right. | 164  | 0.040 | 0.049 | 23  | 0   | 18 |
| Anterior limb of internal capsule left, superior corona radiata left, anterior corona radiata left, superior fronto-occipital fasciculus (could be a part of anterior internal capsule) left, anterior thalamic radiation left, external capsule left.                     | 136  | 0.045 | 0.044 | -23 | -1  | 19 |
| Inferior fronto-occipital fasciculus right, anterior corona radiata right, anterior limb of internal capsule right, anterior thalamic radiation right.                                                                                                                     | 110  | 0.040 | 0.049 | 23  | 26  | 0  |
| Genu of corpus callosum, anterior corona radiata left, body of corpus callosum, superior corona radiata left.                                                                                                                                                              | 62   | 0.045 | 0.049 | -19 | 12  | 27 |
| Unclassified.                                                                                                                                                                                                                                                              | 46   | 0.043 | 0.035 | 15  | 10  | 47 |
| Anterior corona radiata right, anterior thalamic radiation right, Inferior fronto-occipital fasciculus right.                                                                                                                                                              | 45   | 0.021 | 0.049 | 25  | 28  | 10 |

|                                                                                                            |    |       |       |     |     |    |
|------------------------------------------------------------------------------------------------------------|----|-------|-------|-----|-----|----|
| Anterior corona radiata right, superior corona radiata right, anterior limb of internal capsule right.     | 41 | 0.045 | 0.049 | 25  | 15  | 16 |
| Superior corona radiata right, anterior corona radiata right.                                              | 39 | 0.041 | 0.049 | 23  | 16  | 28 |
| Body of corpus callosum.                                                                                   | 21 | 0.039 | 0.041 | -9  | -24 | 26 |
| Posterior limb of internal capsule left, superior corona radiata left.                                     | 20 | 0.043 | 0.044 | -23 | -11 | 17 |
| Unclassified.                                                                                              | 14 | 0.041 | 0.044 | 18  | 28  | 30 |
| Anterior corona radiata right.                                                                             | 7  | 0.040 | 0.049 | 25  | 21  | 16 |
| Body of corpus callosum.                                                                                   | 5  | 0.041 | 0.049 | -15 | 15  | 24 |
| Posterior limb of internal capsule left, corticospinal tract left.                                         | 5  | 0.043 | 0.038 | -26 | -16 | 17 |
| Anterior corona radiata left, anterior thalamic radiation left, Inferior fronto-occipital fasciculus left. | 4  | 0.048 | 0.028 | -24 | 19  | 12 |
| Genu of corpus callosum.                                                                                   | 3  | 0.017 | 0.038 | 20  | 23  | 22 |
| Genu of corpus callosum, forceps minor.                                                                    | 3  | 0.045 | 0.016 | -11 | 31  | 4  |
| Superior corona radiata right.                                                                             | 2  | 0.036 | 0.049 | 29  | -12 | 23 |
| Inferior fronto-occipital fasciculus right, anterior corona radiata right.                                 | 2  | 0.041 | 0.038 | 25  | 25  | 13 |
| Genu of corpus callosum, forceps minor.                                                                    | 2  | 0.030 | 0.013 | -13 | 31  | 8  |
| Inferior fronto-occipital fasciculus right, anterior corona radiata right.                                 | 2  | 0.041 | 0.033 | 21  | 25  | -3 |
| Superior corona radiata left.                                                                              | 1  | 0.038 | 0.031 | -19 | 0   | 32 |

|                                                                                                                                                                                                                                                                                                                                                                                                                                                           |      |       |       |     |     |    |
|-----------------------------------------------------------------------------------------------------------------------------------------------------------------------------------------------------------------------------------------------------------------------------------------------------------------------------------------------------------------------------------------------------------------------------------------------------------|------|-------|-------|-----|-----|----|
| Unclassified.                                                                                                                                                                                                                                                                                                                                                                                                                                             | 1    | 0.036 | 0.031 | 18  | 28  | 28 |
| Superior corona radiata left.                                                                                                                                                                                                                                                                                                                                                                                                                             | 1    | 0.035 | 0.021 | -19 | 10  | 28 |
| Body of corpus callosum.                                                                                                                                                                                                                                                                                                                                                                                                                                  | 1    | 0.049 | 0.015 | -16 | 16  | 26 |
| Unclassified.                                                                                                                                                                                                                                                                                                                                                                                                                                             | 1    | 0.029 | 0.016 | -17 | 38  | 24 |
| Superior corona radiata right.                                                                                                                                                                                                                                                                                                                                                                                                                            | 1    | 0.036 | 0.024 | 25  | 7   | 24 |
| Body of corpus callosum.                                                                                                                                                                                                                                                                                                                                                                                                                                  | 1    | 0.018 | 0.013 | 6   | 10  | 22 |
| Superior corona radiata right.                                                                                                                                                                                                                                                                                                                                                                                                                            | 1    | 0.033 | 0.015 | 25  | 8   | 21 |
| Anterior thalamic radiation right,<br>anterior corona radiata right.                                                                                                                                                                                                                                                                                                                                                                                      | 1    | 0.035 | 0.016 | 23  | 31  | 18 |
| Corticospinal tract left, posterior limb<br>of internal capsule left.                                                                                                                                                                                                                                                                                                                                                                                     | 1    | 0.016 | 0.013 | -26 | -21 | 17 |
| Forceps minor, anterior corona radiata<br>right.                                                                                                                                                                                                                                                                                                                                                                                                          | 1    | 0.014 | 0.013 | 18  | 34  | 9  |
| <b>TSC <math>\cap</math> RD</b>                                                                                                                                                                                                                                                                                                                                                                                                                           |      |       |       |     |     |    |
| Body of corpus callosum, genu of<br>corpus callosum, forceps minor,<br>superior corona radiata right, superior<br>corona radiata left, corticospinal tract<br>left, corticospinal tract right, anterior<br>corona radiata right, posterior corona<br>radiata right, posterior corona radiata<br>left, anterior corona radiata left,<br>Superior longitudinal fasciculus right,<br>superior longitudinal fasciculus right,<br>splenium of corpus callosum. | 4113 | 0.029 | 0.049 | -18 | -15 | 34 |
| Superior corona radiata left,<br>corticospinal tract left, posterior corona<br>radiata left.                                                                                                                                                                                                                                                                                                                                                              | 93   | 0.041 | 0.041 | -26 | -19 | 32 |
| Unclassified.                                                                                                                                                                                                                                                                                                                                                                                                                                             | 72   | 0.049 | 0.049 | -11 | 42  | 35 |

|                                         |    |       |       |     |     |    |
|-----------------------------------------|----|-------|-------|-----|-----|----|
| Unclassified.                           | 12 | 0.031 | 0.049 | -12 | 31  | 41 |
| Unclassified.                           | 8  | 0.037 | 0.049 | -17 | 38  | 24 |
| Genu of corpus callosum, forceps minor. | 7  | 0.031 | 0.049 | -12 | 31  | 8  |
| Unclassified.                           | 7  | 0.029 | 0.044 | -8  | 17  | -8 |
| Body of corpus callosum.                | 4  | 0.023 | 0.049 | 9   | -10 | 27 |
| Unclassified.                           | 3  | 0.037 | 0.049 | -15 | 37  | 30 |
| Unclassified.                           | 3  | 0.041 | 0.049 | 18  | 28  | 30 |
| Body of corpus callosum.                | 3  | 0.041 | 0.049 | 5   | -20 | 24 |
| Body of corpus callosum.                | 2  | 0.049 | 0.044 | -13 | -23 | 28 |
| Body of corpus callosum.                | 2  | 0.037 | 0.049 | 9   | -13 | 27 |
| Superior corona radiata right.          | 2  | 0.041 | 0.049 | 29  | -13 | 23 |
| Unclassified.                           | 1  | 0.020 | 0.049 | 15  | -38 | 38 |
| Unclassified.                           | 1  | 0.041 | 0.044 | -13 | 37  | 34 |
| Unclassified.                           | 1  | 0.031 | 0.044 | -13 | 42  | 30 |
| Unclassified.                           | 1  | 0.037 | 0.044 | -14 | 40  | 30 |
| Unclassified.                           | 1  | 0.032 | 0.044 | 18  | 28  | 28 |
| Superior corona radiata left.           | 1  | 0.041 | 0.044 | -19 | 10  | 28 |
| Body of corpus callosum.                | 1  | 0.029 | 0.035 | 10  | -20 | 26 |
| Body of corpus callosum.                | 1  | 0.049 | 0.035 | 7   | -19 | 25 |
| Body of corpus callosum.                | 1  | 0.032 | 0.044 | 8   | -21 | 25 |
| Genu of corpus callosum.                | 1  | 0.041 | 0.035 | -16 | 22  | 24 |
| Unclassified.                           | 1  | 0.041 | 0.022 | 0   | -21 | 23 |



|                                                                                                                                                              |     |       |       |     |     |    |
|--------------------------------------------------------------------------------------------------------------------------------------------------------------|-----|-------|-------|-----|-----|----|
| Anterior corona radiata left.                                                                                                                                | 1   | 0.017 | 0.013 | -25 | 14  | 13 |
| Genu of corpus callosum.                                                                                                                                     | 1   | 0.007 | 0.013 | -12 | 22  | -7 |
| <b>TSC <math>\cap</math> AD</b>                                                                                                                              |     |       |       |     |     |    |
| Superior corona radiata right.                                                                                                                               | 201 | 0.033 | 0.049 | 25  | -5  | 23 |
| Superior corona radiata left, posterior corona radiata left.                                                                                                 | 162 | 0.045 | 0.049 | -27 | -9  | 27 |
| Anterior corona radiata left, anterior limb of internal capsule left, anterior thalamic radiation left, superior corona radiata left, external capsule left. | 70  | 0.039 | 0.049 | -23 | 0   | 19 |
| Superior corona radiata right, superior fronto-occipital fasciculus (could be a part of anterior internal capsule) right.                                    | 23  | 0.033 | 0.022 | 24  | 0   | 20 |
| Posterior corona radiata left.                                                                                                                               | 22  | 0.016 | 0.024 | -21 | -30 | 28 |
| Superior corona radiata right.                                                                                                                               | 1   | 0.012 | 0.013 | 25  | 4   | 28 |
| Superior corona radiata right.                                                                                                                               | 1   | 0.013 | 0.013 | 25  | 8   | 21 |
| Superior corona radiata right.                                                                                                                               | 1   | 0.013 | 0.014 | 25  | 9   | 19 |
| <b>Slow versus HC</b>                                                                                                                                        |     |       |       |     |     |    |
| <b>FA</b>                                                                                                                                                    |     |       |       |     |     |    |
| Superior corona radiata left, corticospinal tract left.                                                                                                      | 199 | 0.039 | -     | -21 | -21 | 38 |
| Superior corona radiata right, body of corpus callosum, corticospinal tract right.                                                                           | 120 | 0.036 | -     | 20  | -18 | 38 |

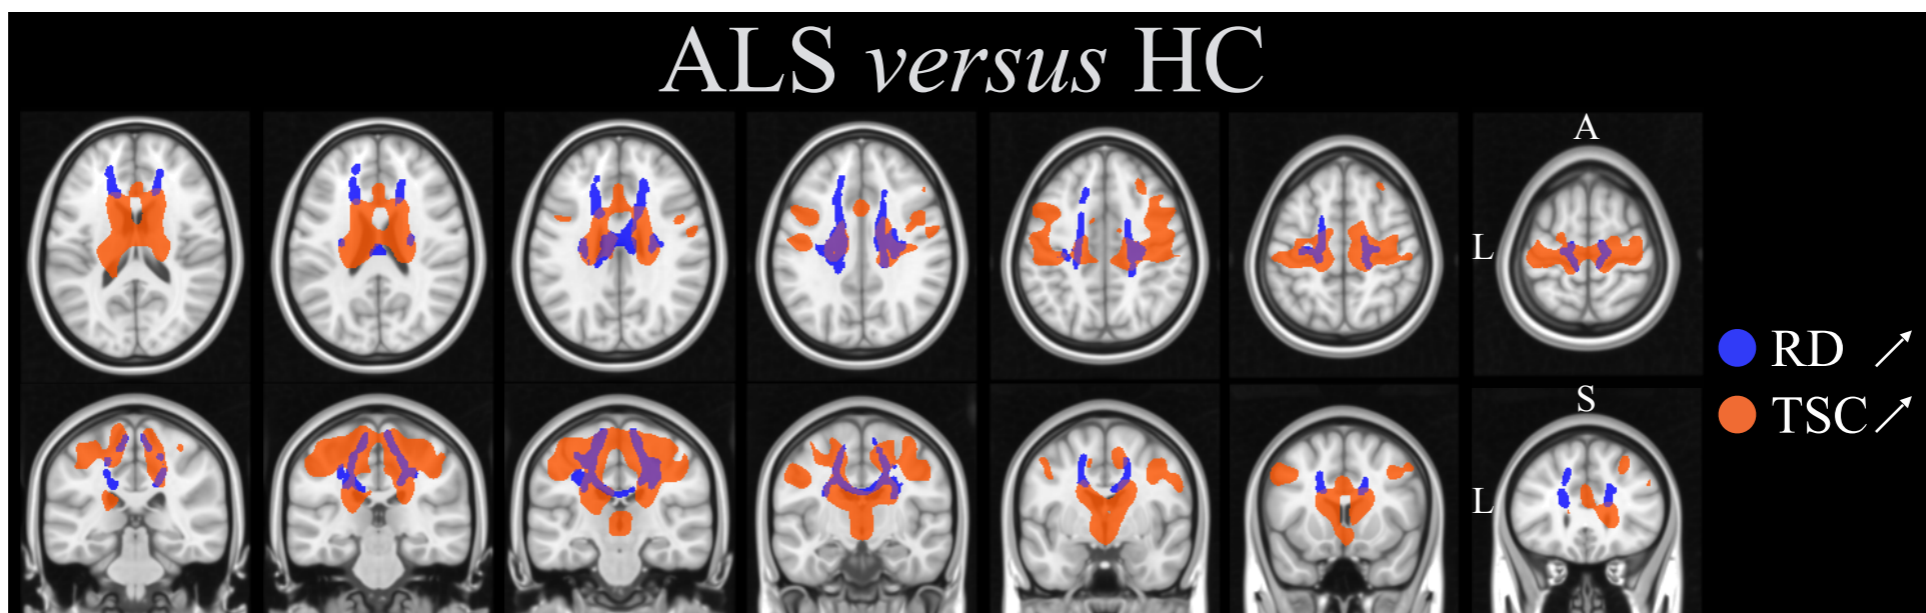

**Supplementary Figure 1.** Significant clusters resulting from the comparison between ALS patients and HC using voxel-wise analysis for TSC (increased in ALS) and tract-based spatial statistics for RD (increased in ALS). A, anterior; ALS, amyotrophic lateral sclerosis; HC, healthy controls; L, left; RD, radial diffusivity; S, superior.

# Fast versus HC

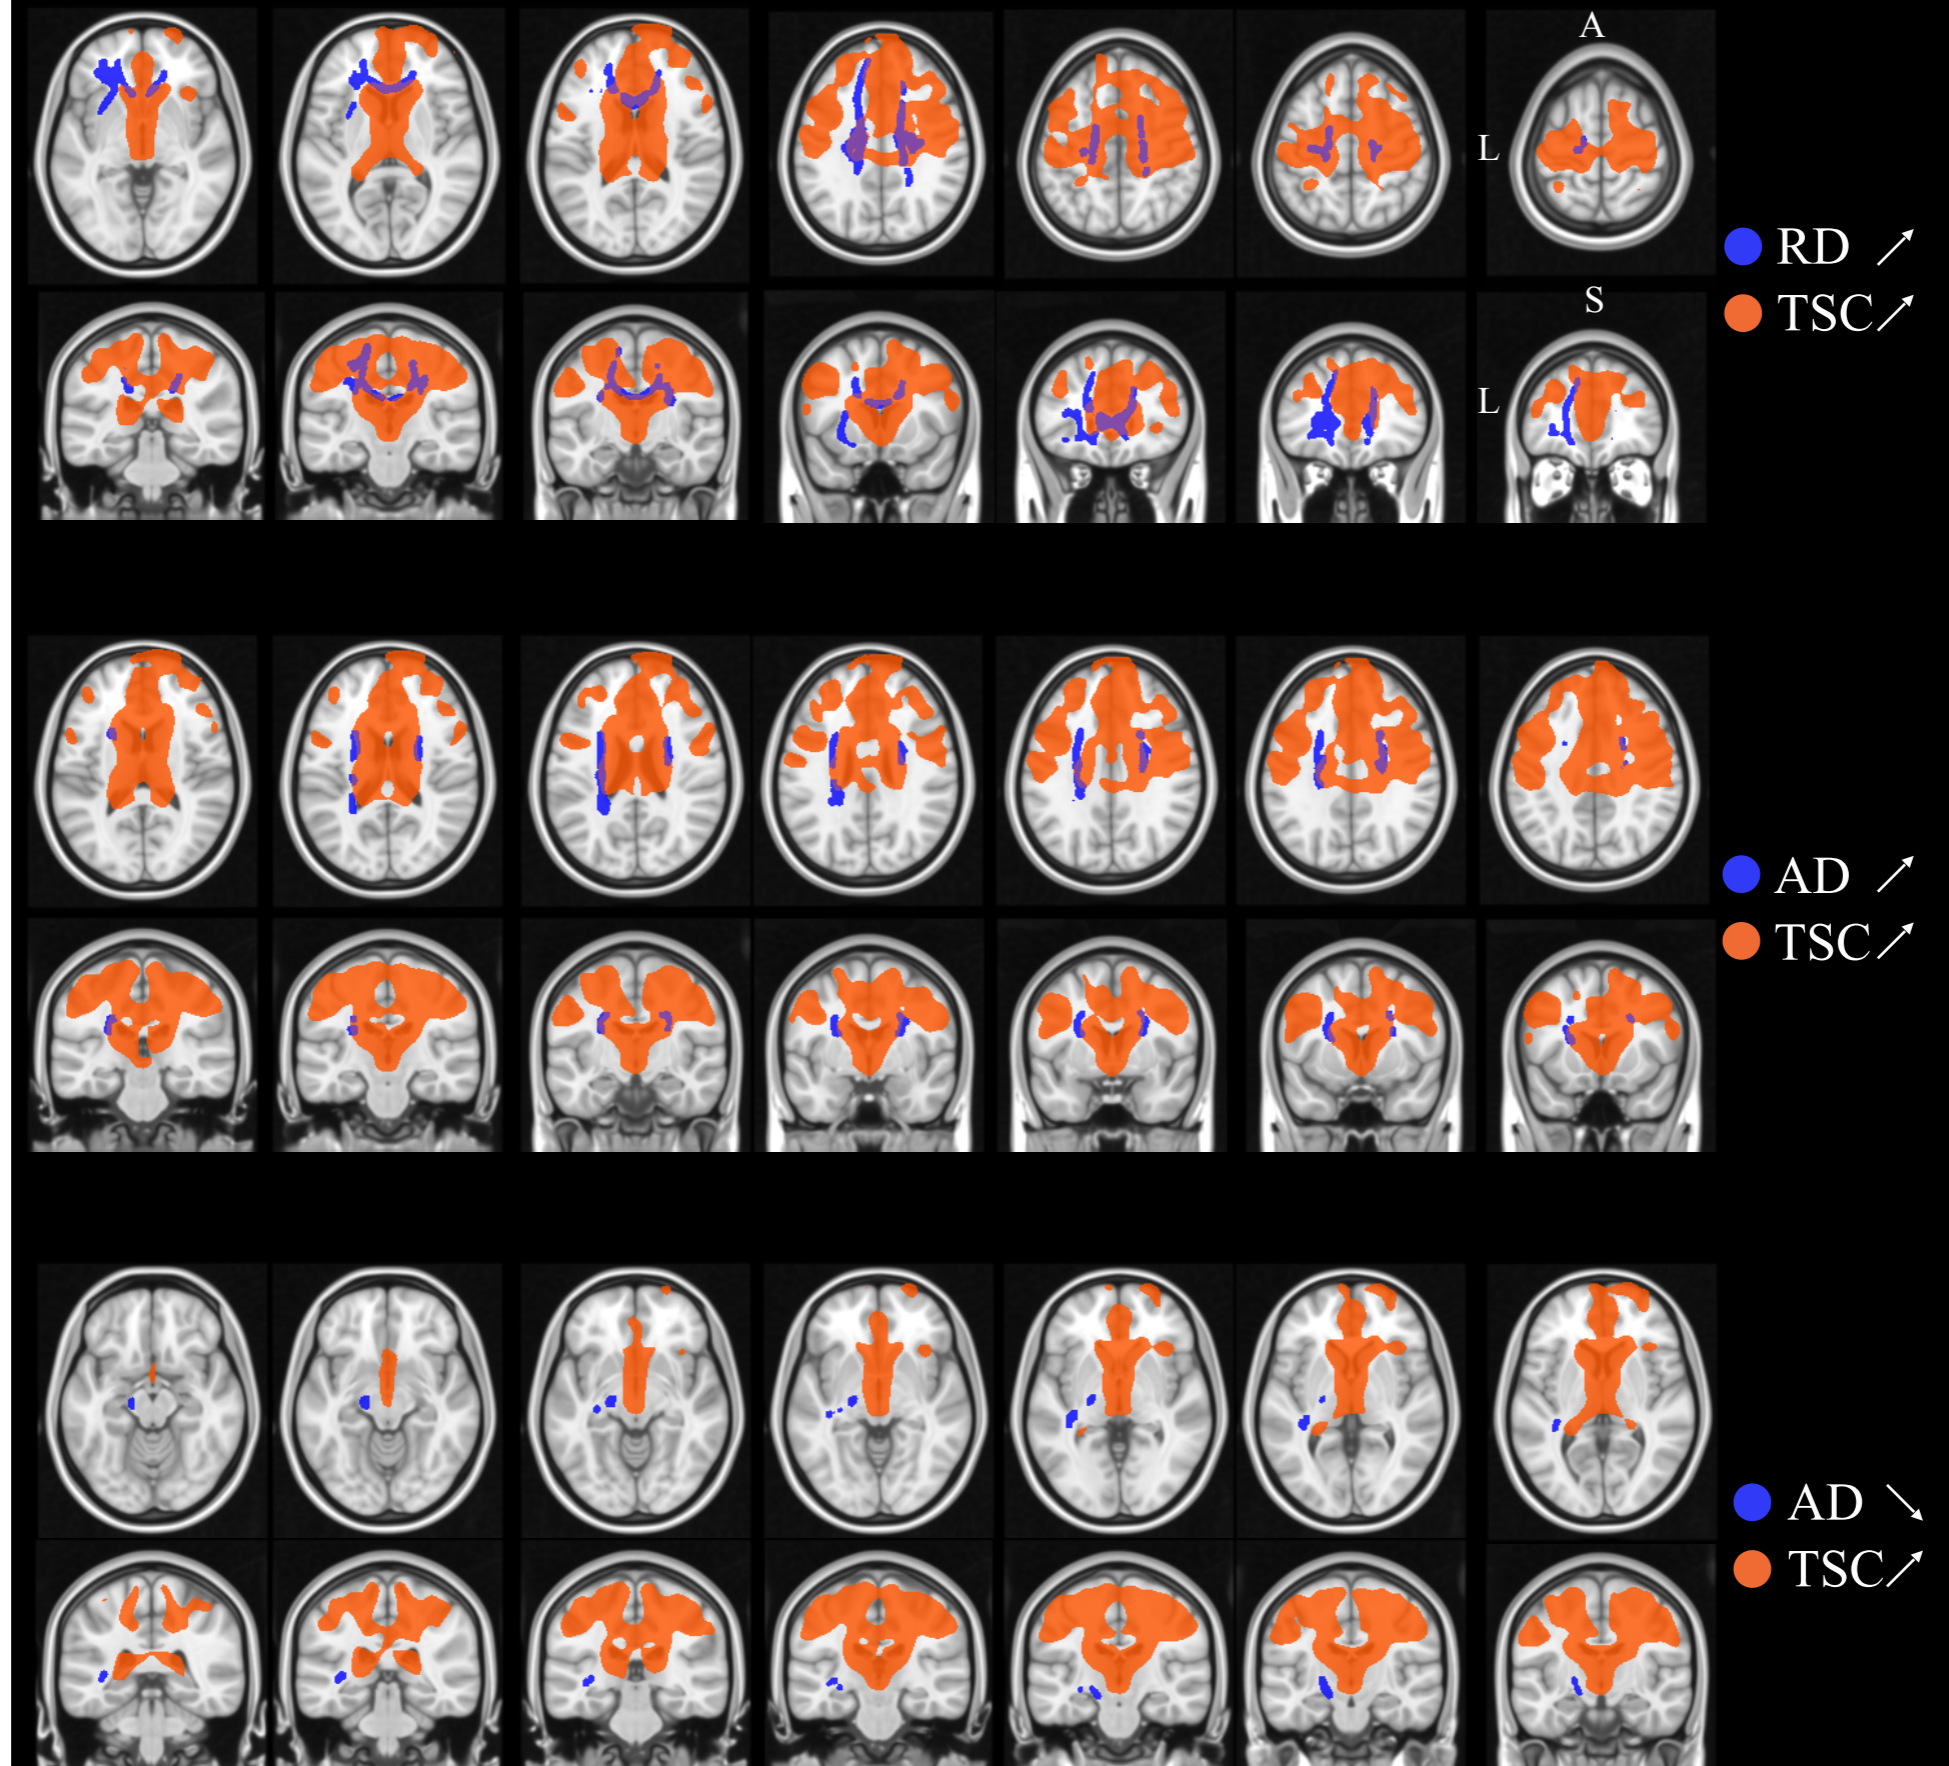

**Supplementary Figure 2.** Significant clusters resulting from the comparison between Fast progressors and HC using voxel-wise analysis for TSC (increased in ALS) and tract-based spatial for RD (increased in ALS) and AD (increased and decreased in ALS). A, anterior; ALS, amyotrophic lateral sclerosis; FA, fractional anisotropy; HC, healthy controls; L, left; MD, mean diffusivity; S, superior.
